# Supplementary material for: A multi-responsive 3D deformable soft actuator with tunable structural color enabled by a graphene/cholesteric liquid crystal elastomer composite
Source: Royal Society of Chemistry journal article supplement (doi:10.1039/d4mh01604a), 2024-12-20
Supplement: d4mh01604a6.pdf [file d4mh01604a6.pdf]

## Supporting Information

### **A multi-responsive 3D deformable soft actuator with tunable structural color enabled by the graphene/cholesteric liquid crystal elastomer composite**

Yuhan Zhang <sup>a</sup>, Baohua Yuan <sup>a</sup>, Yingjie Shi <sup>a</sup>, Xinyu Chen <sup>c</sup>, Zizheng Wang <sup>b</sup>, Longxiang He <sup>a</sup>, Bingxuan Wang <sup>a</sup>, Jiumei Xiao <sup>d</sup>, Meina Yu <sup>a</sup>, Yanzi Gao <sup>a</sup>, Lanying Zhang <sup>b</sup>, Cheng Zou <sup>\*a</sup>, Ruochen Lan <sup>\*c</sup>, and Huai Yang <sup>\*b</sup>

<sup>a</sup> *Beijing Advanced Innovation Center for Materials Genome Engineering, Institute for Advanced Materials and Technology, University of Science and Technology Beijing, Beijing 100083, P. R. China*

<sup>b</sup> *School of Materials Science and Engineering, Peking University, Beijing 1008711, P. R. China*

<sup>c</sup> *College of Chemistry and Materials, Jiangxi Normal University, Nanchang 330022, P. R. China*

<sup>d</sup> *School of Mathematics and Physics, University of Science and Technology Beijing, Beijing 100083, P. R. China*

*\*Corresponding authors:*

*Huai Yang: yanghuai@pku.edu.cn;*

*Ruochen Lan: lanruochen@pku.edu.cn;*

*Cheng Zou: zoucheng@ustb.edu.cn*

## Supplementary Figures

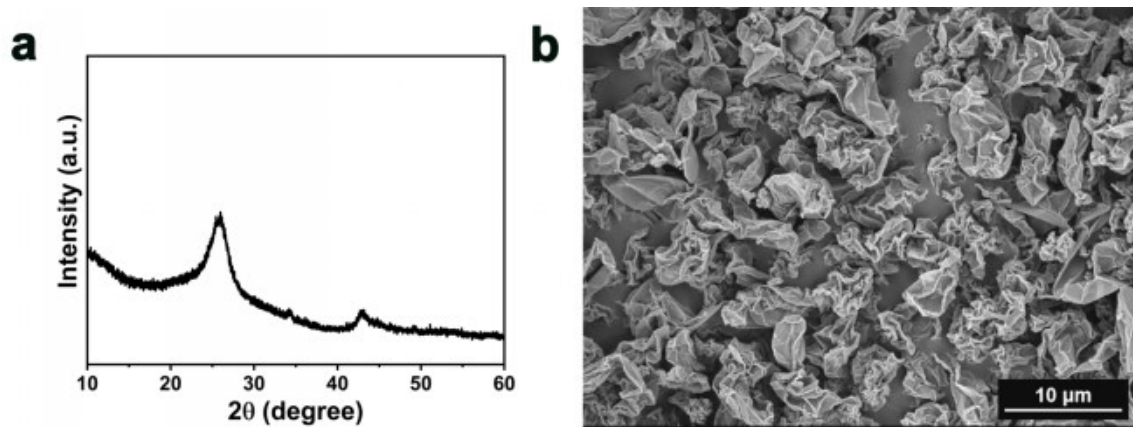

**Fig. S1** (a) XRD pattern and (b) SEM image of the RGO powder.

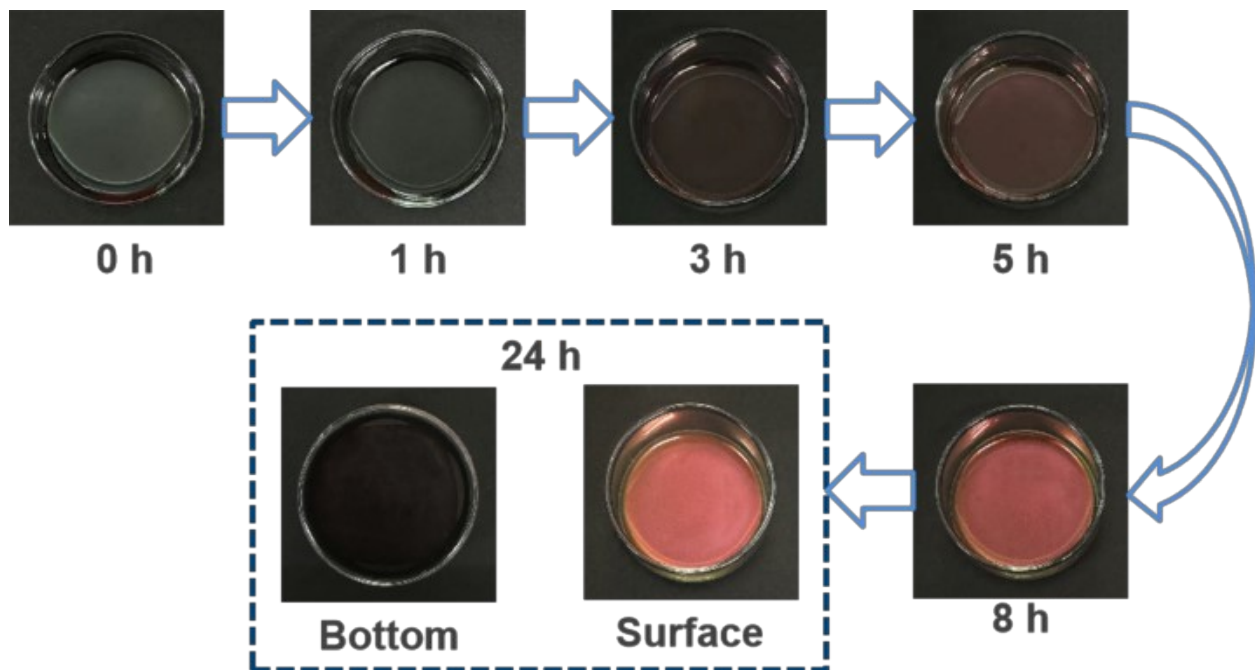

**Fig. S2** Photographs of the formation process of the red-reflecting RGO/CLCE film.

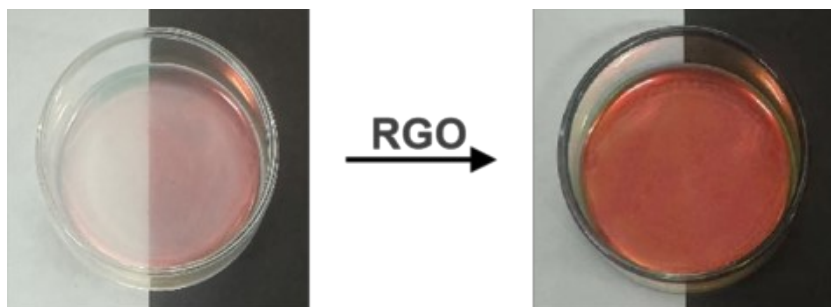

**Fig. S3** Photographs of the CLCE film and RGO/CLCE film under light and dark contrast background.

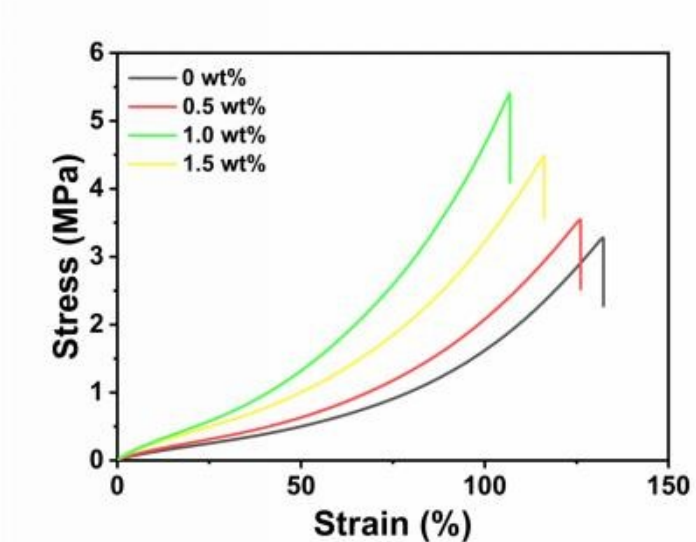

**Fig. S4** The stress-strain curves of the RGO/CLCE films with different content of RGO.

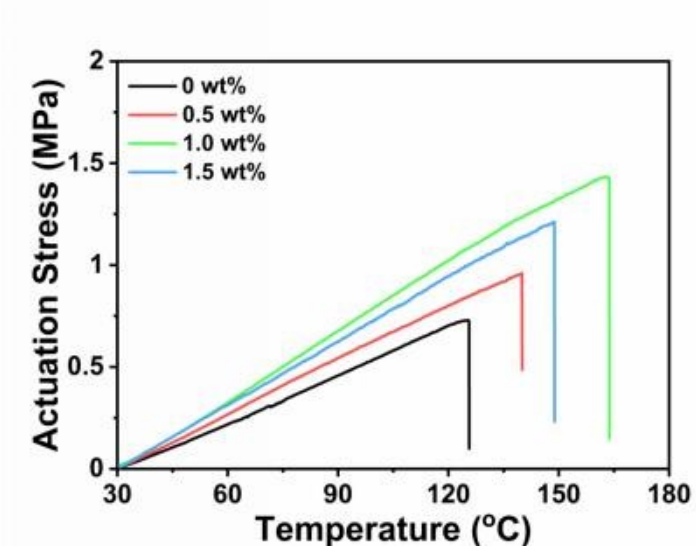

**Fig. S5** The actuation stress of the RGO/CLCE films with different content of RGO.

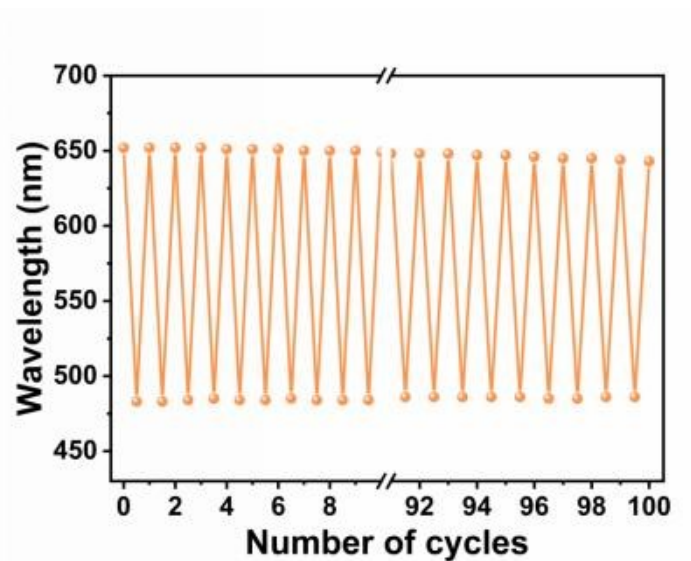

**Fig. S6** The reversibility of the mechanical responsive RGO/CLCE film.

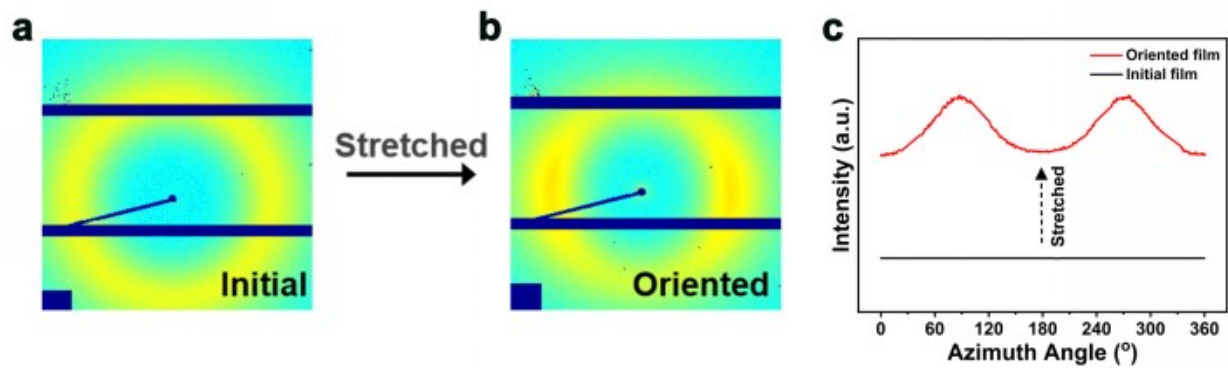

**Fig. S7** 2D-WAXD patterns of (a) the initial red-reflecting CLCE and (b) the stretched green-reflecting CLCE, (c) 1D azimuthal scanning profiles of the initial red-reflecting CLCE and the stretched green-reflecting CLCE.

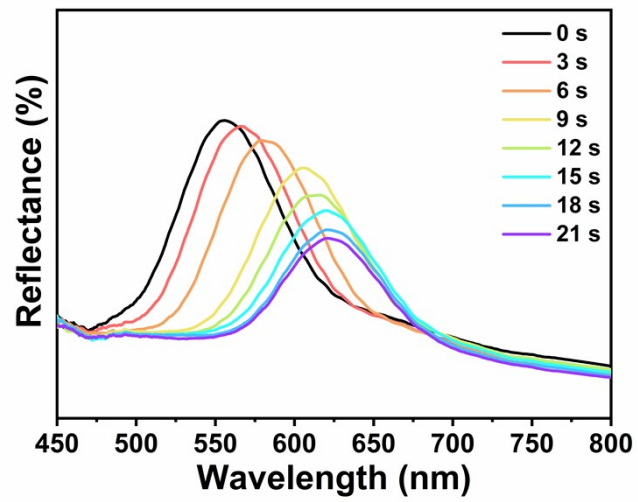

**Fig. S8** The reflection spectra of the RGO/CLCE film with different heating times at 120 °C.

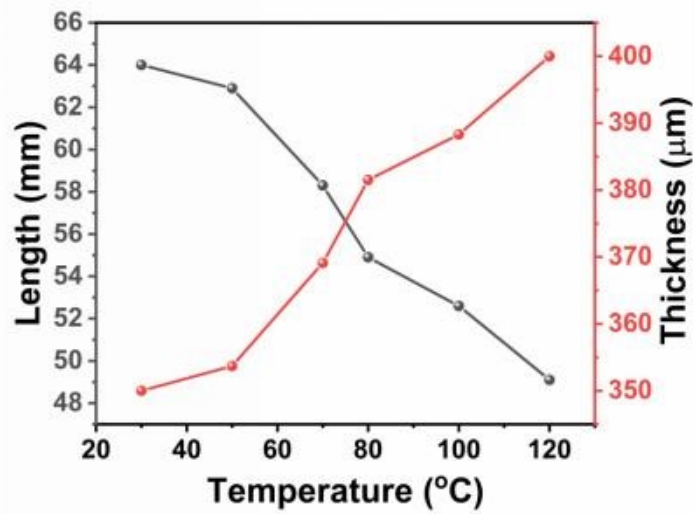

**Fig. S9** The length and thickness of the RGO/CLCE film as a function of temperature.

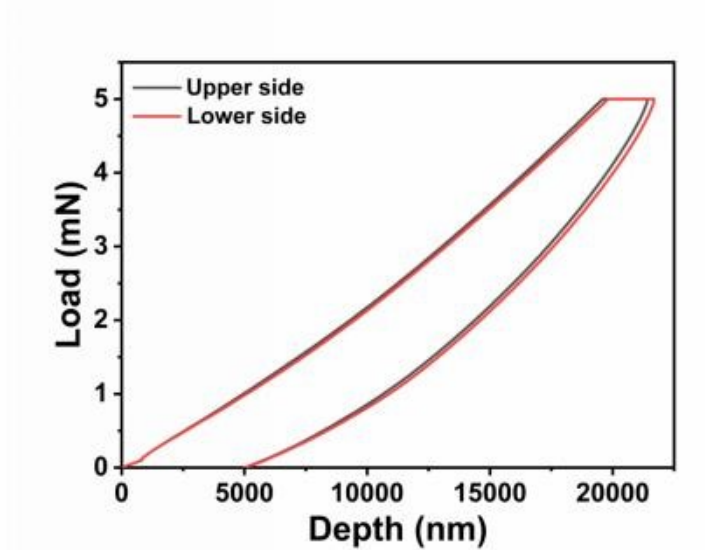

**Fig. S10** The load-displacement graphs for the both sides of the CLCE film.

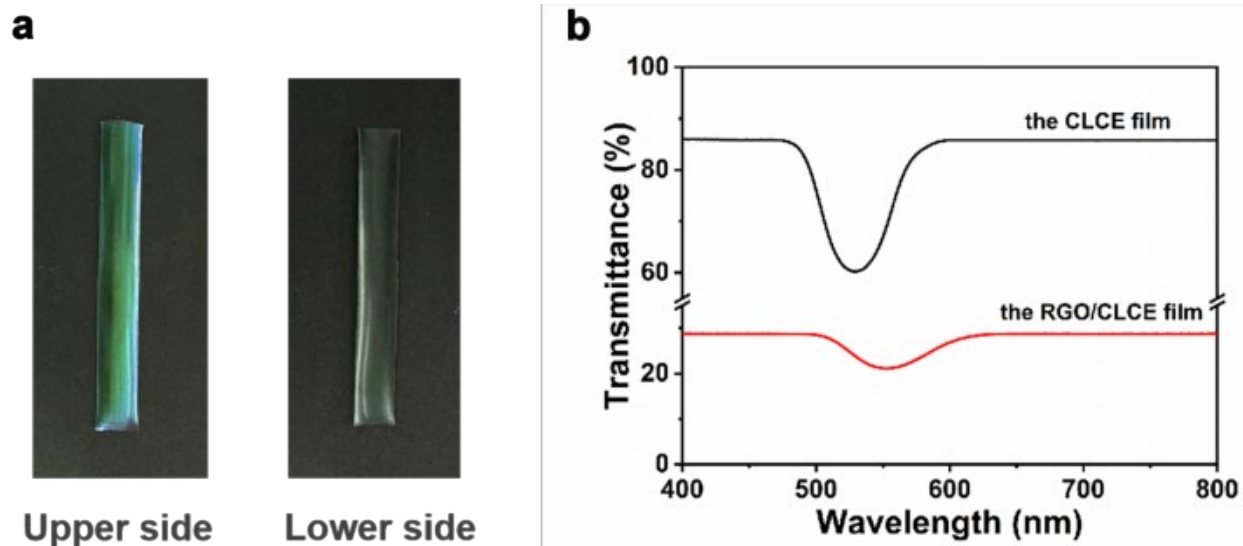

**Fig. S11** (a) Photographs of the upper and lower sides of the RGO/CLCE film, and (b) the transmittance spectra of the CLCE film and the RGO/CLCE film.

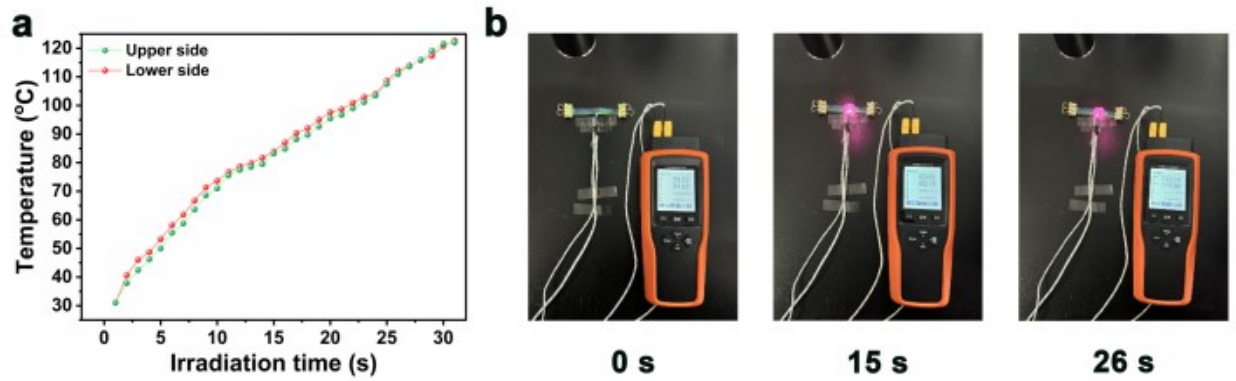

**Fig. S12** (a) The temperature of both sides of the RGO/CLCE film as a function of irradiation time, (b) the photographs of thermocouple temperature measurement at different irradiation times.

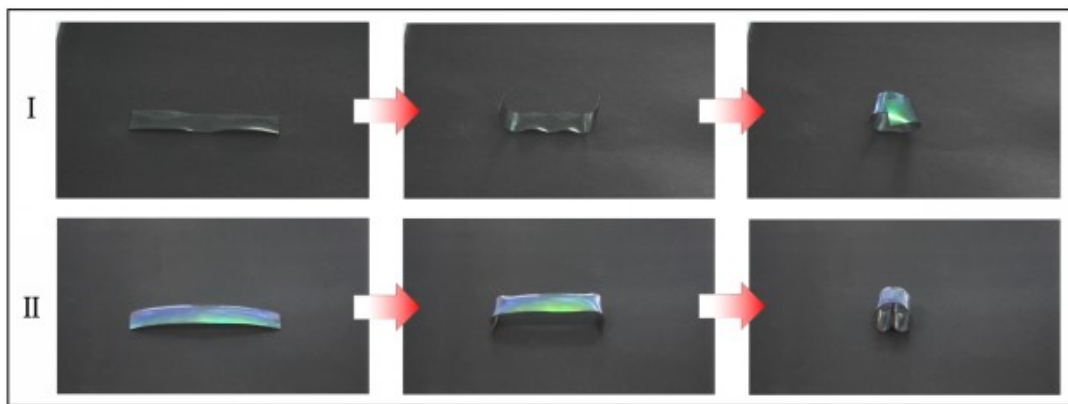

**Fig. S13** The thermal deformable photographs of the (I) upper side and (II) lower side.

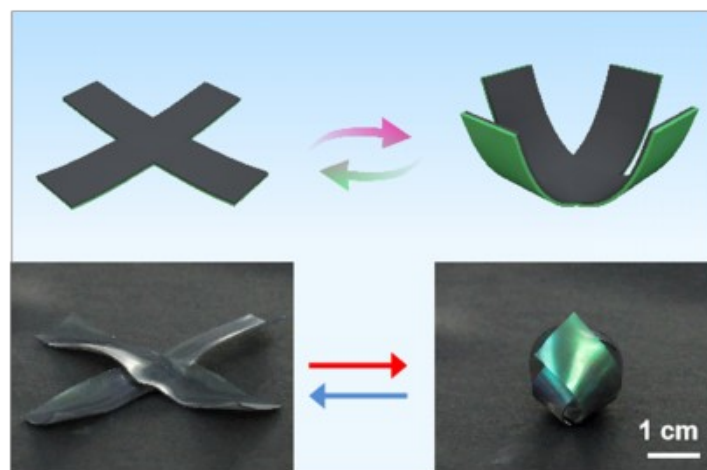

**Fig. S14** The schematic illustrations and photographs of the artificial flower structure actuated by thermal stimulation.

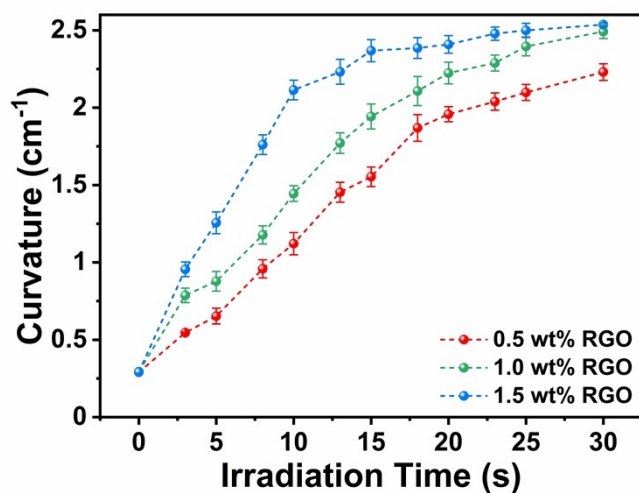

**Fig. S15** Curvatures of the RGO/CLCE film with different content of RGO versus irradiation time under NIR light irradiation (irradiation intensity:  $1.2 \text{ W cm}^{-2}$ ).

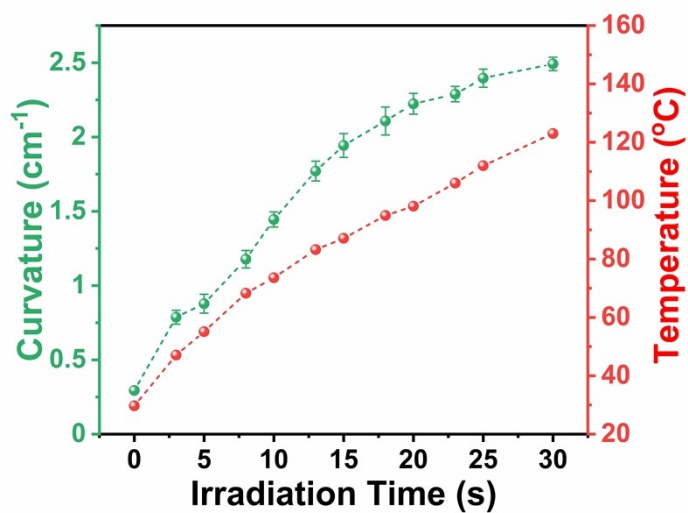

**Fig. S16** Curvatures of the 1.0 wt% RGO/CLCE film with NIR light irradiation and its corresponding temperature versus the irradiation time (irradiation intensity:  $1.2 \text{ W cm}^{-2}$ ).



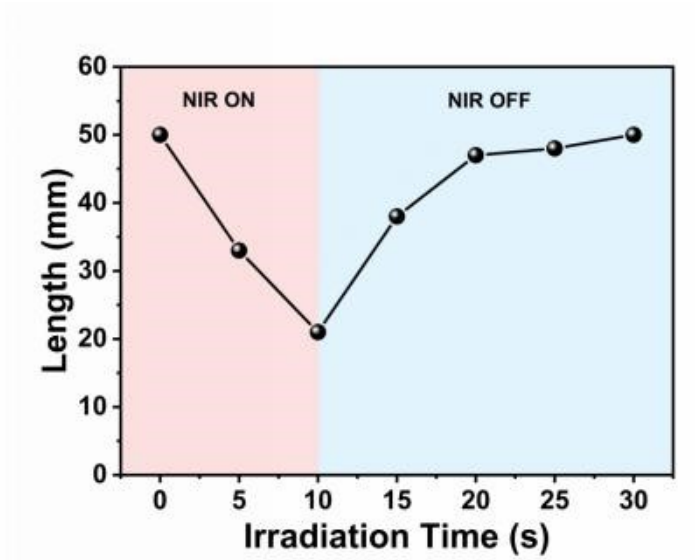

Fig. S17 The length of the RGO/CLCE film as a function of NIR light irradiation time.

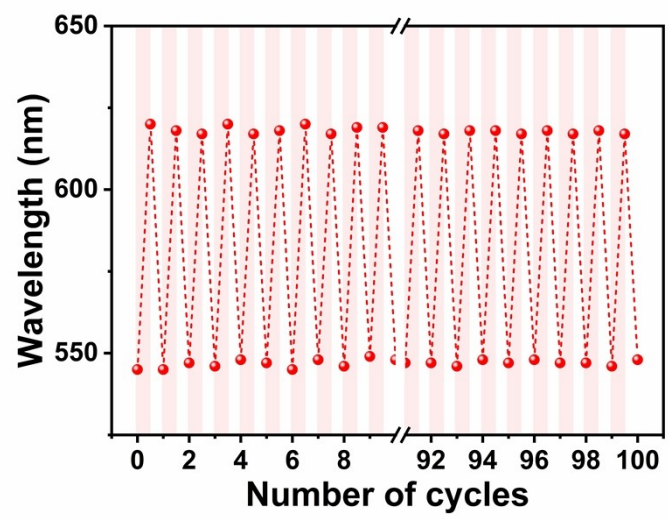

Fig. S18 The reversibility of the reflection spectra of the RGO/CLCE film with NIR light irradiation.

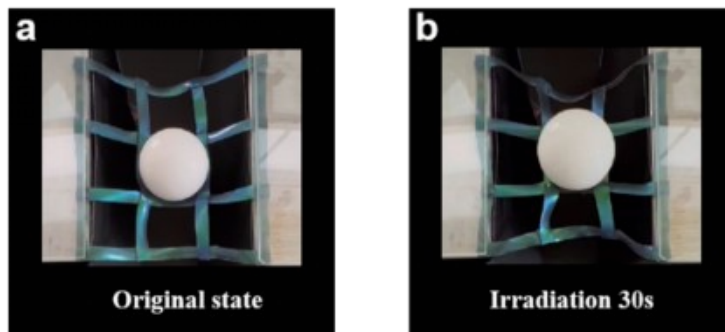

**Fig. S19** Photographs of the ball being lifted (a) before and (b) after NIR light actuation.

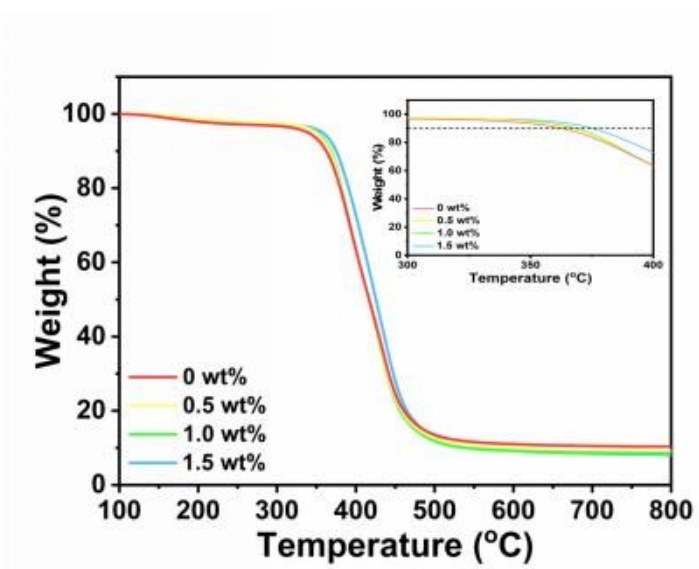

**Fig. S20** The TGA curves of the RGO/CLCE films with different content of RGO.

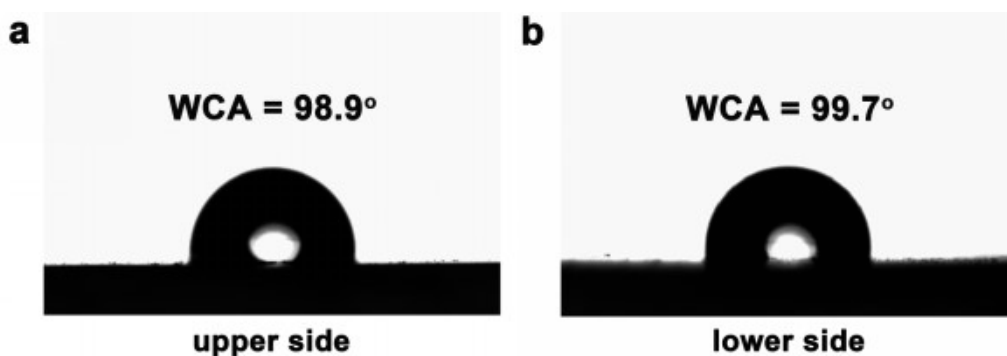

**Fig. S21** (a) Images of the water droplet shapes for (a) the upper side and (b) lower side of the RGO/CLCE film, with their respective contact angles.
